# Supplementary material
Source: HighWire-hosted journal article supplement (https://bmjopen.bmj.com/content/13/9/e072087)
Supplement: inline-supplementary-material-1 [file inline-supplementary-material-1.pdf]

## Supplementary Box

It is anticipated that the longer duration of exposure differences seen in MR studies will generate larger effect sizes than will relatively short-term modification of the exposure in RCTs. For example, the genetic variants related to non-HDL cholesterol (henceforth “cholesterol”, the target of cholesterol lowering drugs such as the statins) have been shown to relate to relatively stable differences from early childhood to late adulthood, thus generating a lifetime of differential exposure to circulating cholesterol. The RCTs of cholesterol lowering drugs designed to show effects on coronary heart disease (CHD) events last ~5 years. Atherosclerosis is a disease process that develops from childhood onwards, and the CHD it generates would not be expected to be abolished by a few years of cholesterol lowering in middle age or older (the usual age included in the RCTs). As there are several cholesterol lowering drugs which target different genes it is possible to compare MR studies using genetic variants in those genes that are robustly related to cholesterol with RCTs of drugs that target those genes. Figure SB1 below combines data from such MR analyses with the RCTs.

As anticipated the RCTs produce about 40% of the risk reduction seen with a lifetime difference in exposure levels<sup>1</sup>. This scaling of the effects predicted from MR studies and seen in the matching trials can be applied to MR/RCT comparisons for other exposures, as the time course of effects being produced may be quicker than seen in the case of cholesterol, or take longer, or indeed there may be no effect in the RCTs if the effect of the exposure acts during a critical period in earlier life and sets in train a disease process that is not reversible by later modification of the exposure<sup>2</sup>.

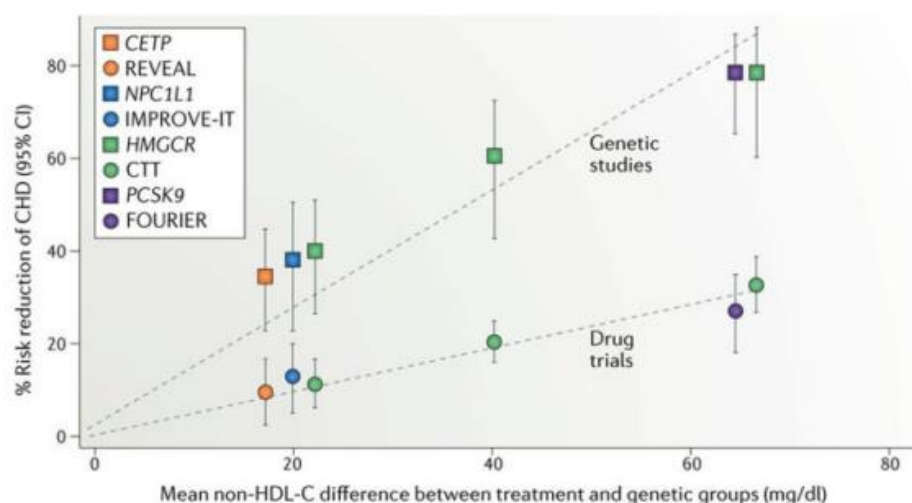

**Figure SB1.** Drug treatment (circles) and genetic proxy (squares) effects on reducing cholesterol levels and the corresponding reduction in risk of from matching drug RCTs and MR analyses. The colours indicate the gene from which variants are taken in the MR studies and the target of the drug used in the named RCTs. Abbreviations: CETP, cholesteryl ester transfer protein; HMGCR, 3-hydroxy-3-methylglutaryl-CoA reductase; NPC1L1, Niemann-Pick C1-like protein 1; PCSK9, proprotein convertase subtilisin/kexin type 9. Figure reproduced with permission from<sup>3</sup>.

## References

1. Smith GD, Ebrahim S. Mendelian randomization: prospects, potentials, and limitations. *Int J Epidemiol.* 2004;33: 30–42. doi:10.1093/ije/dyh132
2. Holmes M V, Ala-Korpela M, Smith GD. Mendelian randomization in cardiometabolic disease: challenges in evaluating causality. *Nat Rev Cardiol.* 2017;14: 577–590. doi:10.1038/nrcardio.2017.78
3. Holmes M V, Smith GD. Revealing the effect of CETP inhibition in cardiovascular disease. *Nat Rev Cardiol.* 2017;14: 635–636. doi:10.1038/nrcardio.2017.156

## Supplementary Note

### ClinicalTrials.Gov Data filtering

We only included studies with most common designs suitable for comparison with published MR studies: *Parallel Assignment* and *Crossover Assignment* (eliminating: *Single Group Assignment*, *Sequential Assignment*, *Factorial Assignment*) intervention model in the Designs table with *Randomized* allocation to allow for selection of RCT. We further used the study type field (=Interventional) with a minimum number of arms = 2 in the Studies table as an additional filtering criterion to arrive at a set of RCT studies. The next stage of filtering concerned background information and study results. We first filtered on the presence of a study description in the Brief Summaries table. The key criterion was then presence of results in the Outcome Analyses table, where we selected the variables: *param\_type*, *param\_value*, *p\_value* and *method*. Next, we needed all conditions to have at least 1 Medical Subject Headings (MeSH) term assigned in all\_conditions view to facilitate automatic comparison with external data sources. We dropped that requirement for interventions, as especially behavioural interventions could not be assigned a MeSH term (see Results). Finally, a range of basic reference and eligibility criteria were required: *brief\_title*, *study\_type*, *overall\_status*, *phase*, *number\_of\_arms*, *enrolment* in the Studies table, *gender*, *criteria* in the Eligibilities table and *outcome title* and *type* in the Outcomes table.

Additionally, we extracted a subset of studies which did not supply any results in the Outcome Analyses table and therefore did not contribute to the *Main* dataset above but were RCT studies with published literature records in the Study References table (*reference type* = result).

### Overview of top SemMed triples for MR and RCT studies

An overview of the top subjects in MR (Figure S4a) and RCTs (Figure S4b) revealed a high number of terms related to adiposity (*obesity*, *body mass index*, *adiponectin*), lipid biology (*lipoproteins*, *hydroxymethylglutaryl-CoA reductase inhibitors*, *PCKSK9*, *high density lipoproteins*) as well as *type 2 diabetes* and *vitamin D*, and recently *COVID-19*. Terms related to *type 2 diabetes* (*insulin*, *metformin*, *diabetes*) and *vitamin D* were also found in RCT triples. As expected by the preponderance of drug interventions in ClinicalTrials.Gov, there was a noticeable bias towards pharmaceutical preparations amongst the top 10 subjects in RCT triples with terms such as *methotrexate*, *aspirin*, *clomiphene citrate*, *dexamethasone*, *prednisolone* and *cyclosporine*. SemMedDB identified *associated with* as a top predicate in MR studies (Figure S4c), followed by *predisposes*, *coexists with* and *affects* which underlines the skew of current MR studies towards identifying risk factors for disease. On the other hand, RCT studies lean towards identifying treatments (Figure S4d) which is reflected in the top 1 predicate *treats* ( $n=7,791$ , second-best *coexists with*  $n=2,149$ ). Among the top objects in MR studies (Figure S4e), we found cardiovascular diseases (*coronary arteriosclerosis*, *coronary heart disease*, *myocardial ischemia/infarction*, *hypertensive disease*, *ischemic stroke*). High frequency of a smaller number of cardiovascular disease terms (Figure S4f) was also found among RCT objects (*hypertensive disease*, *cardiovascular disease*). Both MR and

RCT showed type 2 diabetes, obesity, Alzheimer's disease and COVID-19 as commonly studied conditions. RCT objects included also two infectious diseases: malaria and hepatitis C.

## Supplementary Figures

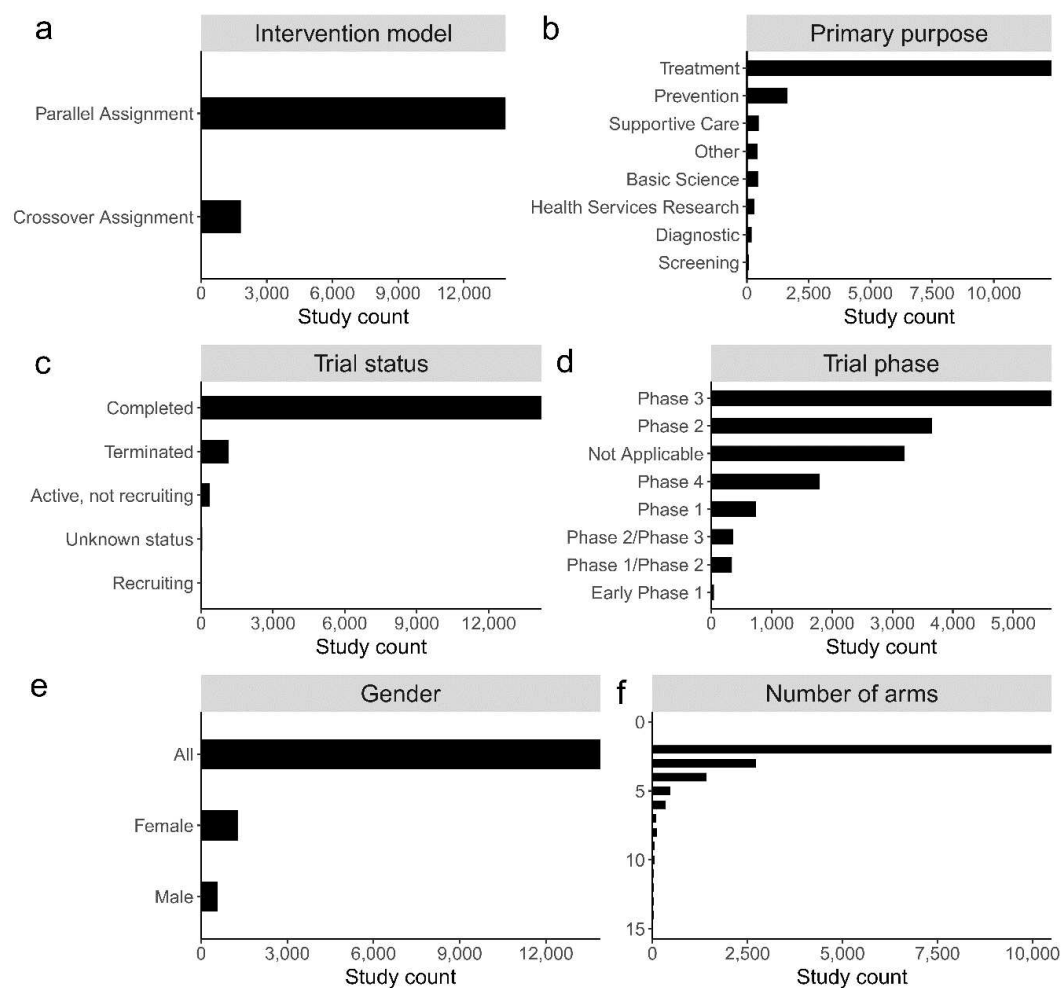

**Figure S1. Overview of RCT general features in the Main dataset by their frequency: a)** intervention model, **b)** primary purpose, **c)** trial status, **d)** trial phase, **e)** gender, **f)** number of arms.

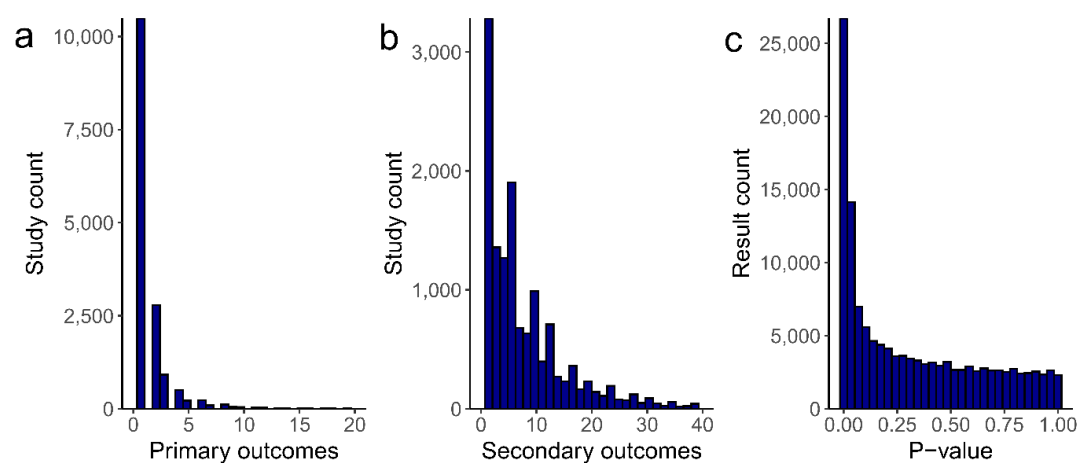

**Figure S2. Distribution of: a) primary outcome number among RCT studies, b) secondary outcome number among RCT studies, c) P-value among study results.**

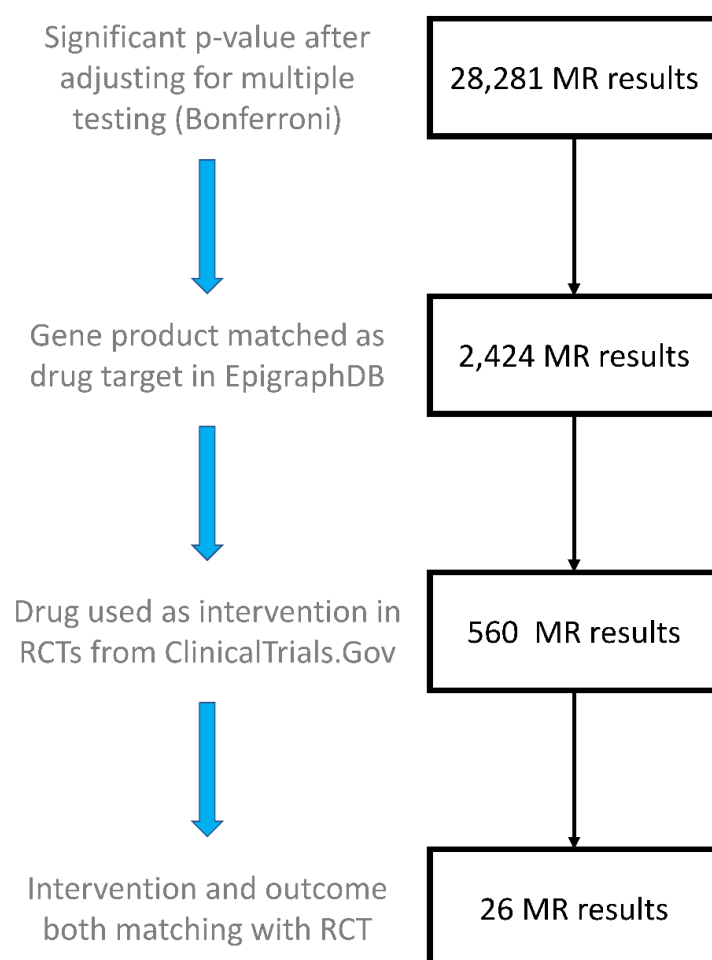

**Figure S3. Filtering steps applied to EpigraphDB database.** Filtering was designed to identify expression QTL MR studies with intervention and exposure matching those of RCT published on ClinicalTrials.Gov.

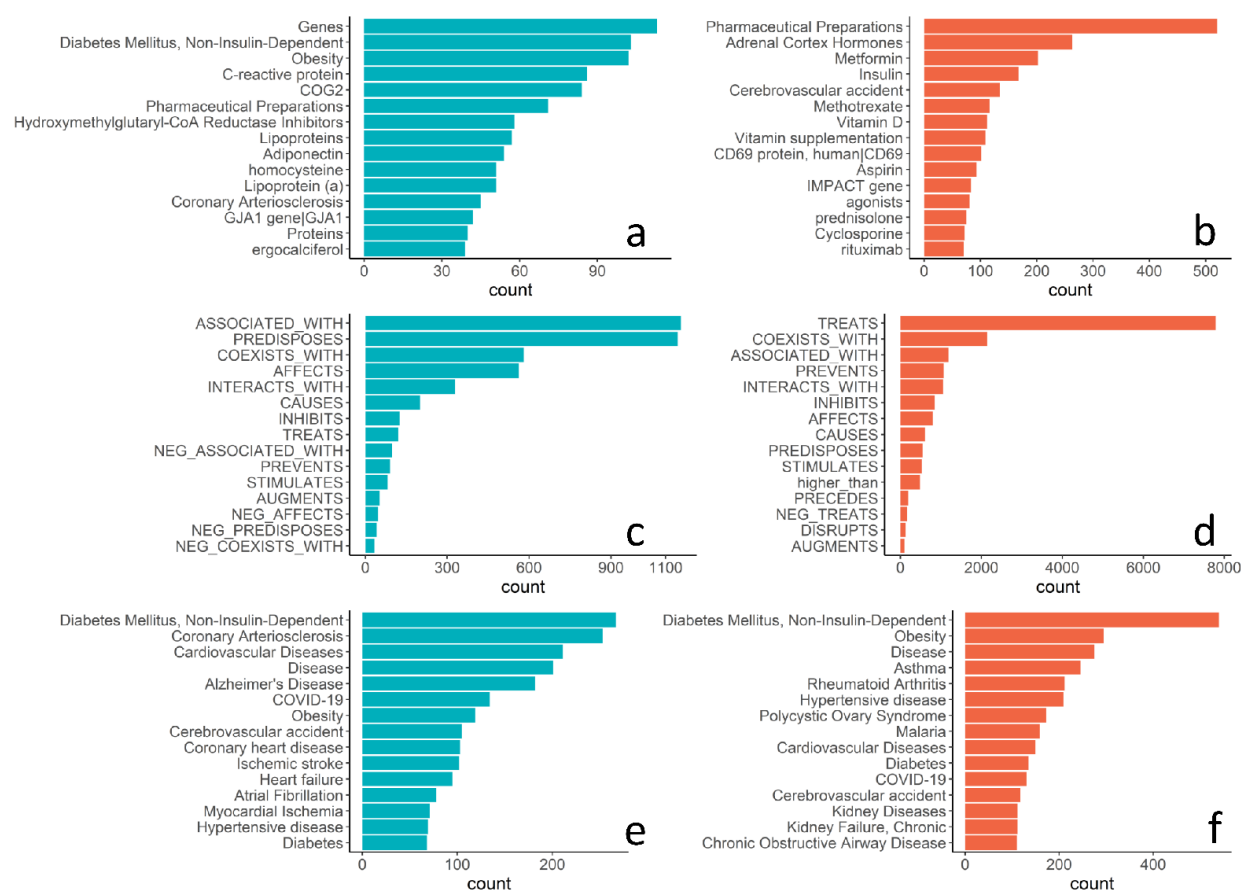

**Figure S4. Overview of SemMedDb semantic triples derived from MR (blue, left-hand panels) and RCT (orange, right-hand panels) studies: a) & b) top 15 subjects, c) & d) top 15 predicates, d) & e) top 15 objects.**

## Supplementary Tables legends

**Table S1.** Comparison of the most common intervention types in the *Main* and *Literature* datasets.

**Table S2.** Drug target-disease matches supported by evidence from MR (blood eQTL instruments, <https://epigraphdb.org/xqtl>) and RCT studies (*Main dataset* from ClinicalTrials.Gov).

**Table S3.** Matching subject-object pairs between MR and RCT studies in semantic triples identified by SemMedDb.

**Table S4.** Matching subjects between MR and RCT studies in semantic triples identified by SemMedDb.

**Table S5.** Matching objects between MR and RCT studies in semantic triples identified by SemMedDb.

**Table S6.** Sample comparison of MR and RCT studies with matching exposures and outcomes across a range of criteria.

**Supplementary Dataset 1.** Select ClinicalTrials.Gov data fields for the RCT studies identified as the *main dataset*.

**Supplementary Dataset 2.** Select ClinicalTrials.Gov data fields for the RCT studies identified as the *literature dataset*.

**Supplementary Dataset 3.** Comparison of frequency of RCT general features between the *Main dataset* and background of all RCTs available in ClinicalTrials.Gov.

**Supplementary Dataset 4.** PubMed and SemMedDB data for published MR and RCT studies.

**Supplementary Dataset 5.** Case series of MR and RCT studies with matching exposures (interventions) and outcomes (conditions).

Table S1

| Intervention        | Main   | Main % | Literature | Literature % |
|---------------------|--------|--------|------------|--------------|
| Drug                | 11,537 | 73.5%  | 10,927     | 38.3%        |
| Other               | 2,054  | 13.1%  | 5,005      | 17.5%        |
| Biological          | 1,497  | 9.5%   | 1,665      | 5.8%         |
| Behavioral          | 1,239  | 7.9%   | 3,017      | 10.6%        |
| Device              | 1,427  | 9.1%   | 3,242      | 11.4%        |
| Procedure           | 481    | 3.1%   | 3,597      | 12.6%        |
| Dietary Supplement  | 242    | 1.5%   | 830        | 2.9%         |
| Radiation           | 134    | 0.9%   | 764        | 2.7%         |
| Genetic             | 21     | 0.1%   | 145        | 0.5%         |
| Combination Product | 42     | 0.3%   | 135        | 0.5%         |
| Diagnostic Test     | 15     | 0.1%   | 842        | 3.0%         |

Table S2

| MR Exposure         | RCT Drug Intervention                  | MR Outcomes                                                                                                                                    | RCT Conditions                                                                   | Matching trials | Concordant direction of effect?        | xQTL |
|---------------------|----------------------------------------|------------------------------------------------------------------------------------------------------------------------------------------------|----------------------------------------------------------------------------------|-----------------|----------------------------------------|------|
| CETP                | EVACETRAPIB, ANACETRAPIB               | LDL cholesterol    id:300, HDL cholesterol    id:299, Total cholesterol    id:301, Triglycerides    id:302                                     | Hyperlipidemia, Dyslipidemia, Hypercholesterolemia, Hyperlipoproteinemia Type II | 7               | Yes                                    | eQTL |
| HMGCR               | ATORVASTATIN, PRAVASTATIN, SIMVASTATIN | LDL cholesterol    id:300, Total cholesterol    id:301, Non-cancer illness code, self-reported: high cholesterol    id:UKB-b:10912             | Hyperlipidemia, Dyslipidemia, Hypercholesterolemia, Mixed Dyslipidemia etc.      | 50              | Yes                                    | eQTL |
| GUCY1A3 and GUCY1B3 | RIOCIGUAT                              | Diastolic blood pressure automated reading    id:UKB-a:359, Vascular/heart problems diagnosed by doctor: High blood pressure    id:UKB-b:14177 | Pulmonary Hypertension, Pulmonary Arterial Hypertension                          | 7               | Yes                                    | eQTL |
| IGF1R               | MECASERMIN                             | Height    id:89                                                                                                                                | Growth Disorders Insulin-Like Growth Factor-1 Deficiency                         | 1               | No                                     | eQTL |
| IL2RA               | DACLIZUMAB                             | Type 1 diabetes    id:285                                                                                                                      | Diabetes Mellitus, Type 1                                                        | 1               | No - no significant effect seen in RCT | eQTL |
| KCNJ11              | GLIMEPIRIDE                            | Diabetes diagnosed by doctor    id:UKB-b:10753                                                                                                 | Diabetes Mellitus, Type 2, Diabetes, Pre-diabetes                                | 63              | Yes                                    | eQTL |

|       |                                          |                                                                                                                                                                          |                                                                                                      |   |                                                 |      |
|-------|------------------------------------------|--------------------------------------------------------------------------------------------------------------------------------------------------------------------------|------------------------------------------------------------------------------------------------------|---|-------------------------------------------------|------|
| ACE   | ENALAPRIL,<br>LISINOPRIL,<br>PERINDOPRIL | Vascular/heart problems diagnosed<br>by doctor: High blood pressure   <br>id:UKB-b:14177                                                                                 | Hypertension, Essential<br>Hypertension, Hypertension,<br>Pulmonary Ventricular<br>Dysfunction, Left | 3 | Yes                                             | eQTL |
| PDE3A | ANAGRELIDE                               | Platelet count    id:1008                                                                                                                                                | Thrombocythemia                                                                                      | 1 | Yes                                             | eQTL |
| CD86  | ABATACEPT                                | Multiple sclerosis    id:1025                                                                                                                                            | Multiple Sclerosis, Relapsing-<br>Remitting                                                          | 1 | No - no<br>significant<br>effect seen in<br>RCT | eQTL |
| ESR1  | FULVESTRANT,<br>TAMOXIFEN                | Breast cancer (Combined<br>Oncoarray; iCOGS; GWAS meta<br>analysis)    id:1126                                                                                           | Breast Cancer, Estrogen<br>Receptor-positive (ER+)<br>Breast Cancer etc.                             | 9 | Yes*                                            | eQTL |
| ESR1  | ESTRADIOL,<br>POLYESTRADIOL<br>PHOSPHATE | Femoral neck bone mineral density<br>   id:980, Lumbar spine bone<br>mineral density    id:982, Heel<br>bone mineral density (BMD) T-<br>score automated    id:UKB-a:500 | Bone Mineral Density                                                                                 | 1 | No*                                             | eQTL |
| PARP3 | OLAPARIB,<br>VELIPARIB,<br>RUCAPARIB     | Ovarian cancer    id:1120                                                                                                                                                | Ovarian Neoplasms, Ovarian<br>Cancer etc.                                                            | 7 | No                                              | eQTL |

|       |                                              |                                                                      |                                                   |    |    |      |
|-------|----------------------------------------------|----------------------------------------------------------------------|---------------------------------------------------|----|----|------|
| MS4A1 | OCRELIZUMAB,<br>OFATUMUMAB,<br>RITUXIMAB     | Rheumatoid arthritis    id:833,<br>Type 1 Diabetes Mellitus          | Rheumatoid Arthritis, Type 1<br>Diabetes Mellitus | 10 | No | eQTL |
| JAK2  | TOFACITINIB                                  | Crohn's disease    id:12,<br>Inflammatory bowel disease   <br>id:294 | Ulcerative Colitis, Crohn's<br>Disease            | 6  | No | eQTL |
| TYK2  | TOFACITINIB,<br>PEFICITINIB,<br>UPADACITINIB | Rheumatoid arthritis    id:833,<br>Psoriasis    id:282               | Rheumatoid arthritis,<br>Psoriasis                | 34 | No | eQTL |

Table S3

| subject                                                         | object                                   | MR | RCT |
|-----------------------------------------------------------------|------------------------------------------|----|-----|
| Obesity                                                         | Disease                                  | 9  | 5   |
| Lipoproteins                                                    | Cardiovascular Diseases                  | 8  | 1   |
| Diabetes Mellitus, Non-Insulin-Dependent                        | Disease                                  | 7  | 2   |
| Obesity                                                         | Diabetes Mellitus, Non-Insulin-Dependent | 7  | 6   |
| Asthma                                                          | Obesity                                  | 6  | 1   |
| Insulin                                                         | Obesity                                  | 6  | 8   |
| Adiponectin                                                     | Diabetes Mellitus, Non-Insulin-Dependent | 5  | 1   |
| Coronary Arteriosclerosis                                       | Cardiovascular Diseases                  | 5  | 1   |
| COVID-19                                                        | Disease                                  | 5  | 1   |
| Diabetes Mellitus, Non-Insulin-Dependent                        | Diabetes                                 | 5  | 5   |
| Disease                                                         | Diabetes Mellitus, Non-Insulin-Dependent | 5  | 2   |
| Myocardial Infarction                                           | Cardiovascular Diseases                  | 5  | 1   |
| Obesity                                                         | Asthma                                   | 5  | 4   |
| Pharmaceutical Preparations                                     | Disease                                  | 5  | 14  |
| C-reactive protein                                              | Cardiovascular Diseases                  | 4  | 1   |
| Cerebrovascular accident                                        | Cardiovascular Diseases                  | 4  | 1   |
| cytokine                                                        | Disease                                  | 4  | 1   |
| ergocalciferol                                                  | COVID-19                                 | 4  | 1   |
| Hypertensive disease                                            | Cardiovascular Diseases                  | 4  | 18  |
| Insulin                                                         | Diabetes Mellitus, Non-Insulin-Dependent | 4  | 36  |
| Lipids                                                          | Pharmaceutical Preparations              | 4  | 1   |
| Lipoproteins                                                    | Coronary heart disease                   | 4  | 1   |
| Pharmaceutical Preparations                                     | Coronary Arteriosclerosis                | 4  | 4   |
| Amino Acids, Branched-Chain                                     | Diabetes Mellitus, Non-Insulin-Dependent | 3  | 1   |
| C-reactive protein                                              | Diabetes Mellitus, Non-Insulin-Dependent | 3  | 1   |
| CD69 protein, human CD69                                        | Cerebrovascular accident                 | 3  | 1   |
| Diabetes Mellitus, Non-Insulin-Dependent                        | Cardiovascular Diseases                  | 3  | 10  |
| Genes                                                           | Pharmaceutical Preparations              | 3  | 1   |
| High Density Lipoproteins                                       | Coronary Arteriosclerosis                | 3  | 1   |
| Hydroxymethylglutaryl-CoA Reductase Inhibitors                  | Coronary Arteriosclerosis                | 3  | 2   |
| Hydroxymethylglutaryl-CoA Reductase Inhibitors HMGCR gene HMGCR |                                          | 3  | 1   |
| IMPACT gene                                                     | Cardiovascular Diseases                  | 3  | 2   |
| mullerian-inhibiting hormone                                    | Polycystic Ovary Syndrome                | 3  | 4   |
| Obesity                                                         | Cardiovascular Diseases                  | 3  | 7   |
| Obesity                                                         | COVID-19                                 | 3  | 2   |
| Obesity                                                         | Hypertensive disease                     | 3  | 3   |
| Pharmaceutical Preparations                                     | Cardiovascular Diseases                  | 3  | 1   |
| Polycystic Ovary Syndrome                                       | Disease                                  | 3  | 1   |
| Vitamin D Deficiency                                            | Cardiovascular Diseases                  | 3  | 1   |
| Vitamin D                                                       | Disease                                  | 3  | 1   |
| Apolipoprotein E APOE                                           | Alzheimer's Disease                      | 2  | 2   |
| Atrial Fibrillation                                             | Ischemic stroke                          | 2  | 1   |
| Cardiovascular Diseases                                         | Diabetes Mellitus, Non-Insulin-Dependent | 2  | 3   |
| Cardiovascular Diseases                                         | Disease                                  | 2  | 1   |
| Coronary Arteriosclerosis                                       | Disease                                  | 2  | 1   |
| Coronary Arteriosclerosis                                       | Heart failure                            | 2  | 2   |
| COVID-19                                                        | Obesity                                  | 2  | 2   |

|                                          |                                          |   |    |
|------------------------------------------|------------------------------------------|---|----|
| Diabetes Mellitus, Non-Insulin-Dependent | COVID-19                                 | 2 | 1  |
| Diabetes Mellitus, Non-Insulin-Dependent | Heart failure                            | 2 | 1  |
| Diabetic Nephropathy                     | Diabetes Mellitus, Insulin-Dependent     | 2 | 1  |
| Disease                                  | Cerebrovascular accident                 | 2 | 1  |
| Disease                                  | Multiple Sclerosis                       | 2 | 1  |
| Disease                                  | Obesity                                  | 2 | 2  |
| Dyslipidemias                            | Coronary Arteriosclerosis                | 2 | 1  |
| ergocalciferol                           | Cardiovascular Diseases                  | 2 | 1  |
| ergocalciferol                           | Disease                                  | 2 | 1  |
| Ethanol                                  | Disease                                  | 2 | 2  |
| GJA1 gene GJA1                           | Obesity                                  | 2 | 1  |
| Heart failure                            | Ischemic stroke                          | 2 | 1  |
| homocysteine                             | Alzheimer's Disease                      | 2 | 2  |
| homocysteine                             | Cardiovascular Diseases                  | 2 | 6  |
| Hyperandrogenism                         | Polycystic Ovary Syndrome                | 2 | 5  |
| Hypertensive disease                     | Cerebrovascular accident                 | 2 | 4  |
| IMPACT gene                              | COVID-19                                 | 2 | 2  |
| Myocardial Infarction                    | Heart failure                            | 2 | 2  |
| Obesity                                  | Polycystic Ovary Syndrome                | 2 | 1  |
| Obesity                                  | Psoriasis                                | 2 | 1  |
| Pharmaceutical Preparations              | Alzheimer's Disease                      | 2 | 5  |
| Pharmaceutical Preparations              | Atherosclerosis                          | 2 | 1  |
| Pharmaceutical Preparations              | Diabetes                                 | 2 | 14 |
| Pharmaceutical Preparations              | Parkinson Disease                        | 2 | 1  |
| Testosterone                             | Risk factor, cardiovascular              | 2 | 1  |
| Vitamin B 12                             | Body mass index                          | 2 | 1  |
| Vitamin D                                | Vitamin D Deficiency                     | 2 | 3  |
| Vitamin supplementation                  | Cardiovascular Diseases                  | 2 | 3  |
| Vitamin supplementation                  | COVID-19                                 | 2 | 1  |
| Vitamin supplementation                  | Diabetes Mellitus, Non-Insulin-Dependent | 2 | 3  |
| Vitamin supplementation                  | Vitamin D Deficiency                     | 2 | 3  |
| acylcarnitine                            | Fatty Acids                              | 1 | 1  |
| Adipokines                               | Diabetes Mellitus, Non-Insulin-Dependent | 1 | 1  |
| Adipokines                               | Obesity                                  | 1 | 2  |
| Adiponectin                              | Obesity                                  | 1 | 1  |
| Age related macular degeneration         | Blind Vision                             | 1 | 2  |
| Alanine Transaminase                     | Alkaline Phosphatase                     | 1 | 1  |
| Analgesics                               | Degenerative polyarthritis               | 1 | 4  |
| Angiotensin-Converting Enzyme Inhibitors | Angiotensin Receptor                     | 1 | 2  |
| Anti-Inflammatory Agents                 | Disease                                  | 1 | 2  |
| Anticoagulants                           | Myocardial Ischemia                      | 1 | 1  |
| Antioxidants                             | Coronary Arteriosclerosis                | 1 | 1  |
| Antioxidants                             | Rheumatoid Arthritis                     | 1 | 1  |
| Apolipoproteins B                        | Apolipoprotein A-I                       | 1 | 1  |
| Apolipoproteins                          | Alzheimer's Disease                      | 1 | 1  |
| ascorbic acid                            | COVID-19                                 | 1 | 1  |
| Atherosclerosis                          | Cardiovascular Diseases                  | 1 | 1  |
| Atherosclerosis                          | Diabetes Mellitus, Non-Insulin-Dependent | 1 | 1  |
| Atrial Fibrillation                      | Sleep Apnea, Obstructive                 | 1 | 1  |
| bempeidoic acid                          | Hypercholesterolemia                     | 1 | 1  |

|                                          |                                          |   |   |
|------------------------------------------|------------------------------------------|---|---|
| Beta Carotene                            | Diabetes Mellitus, Non-Insulin-Dependent | 1 | 1 |
| Biological Markers                       | Alzheimer's Disease                      | 1 | 1 |
| Body mass index                          | Diabetes                                 | 1 | 1 |
| C-reactive protein                       | Disease                                  | 1 | 1 |
| C-reactive protein                       | Obesity                                  | 1 | 3 |
| Cardiovascular Diseases                  | Coronary heart disease                   | 1 | 1 |
| Cardiovascular Diseases                  | Polycystic Ovary Syndrome                | 1 | 1 |
| Carotid Intima-Media Thickness           | Arteriosclerosis                         | 1 | 1 |
| CD69 protein, human CD69                 | Alzheimer's Disease                      | 1 | 1 |
| CD69 protein, human CD69                 | Cardiovascular Diseases                  | 1 | 1 |
| CD69 protein, human CD69                 | Hypertensive disease                     | 1 | 1 |
| CD69 protein, human CD69                 | Obesity                                  | 1 | 2 |
| Cerebrovascular accident                 | Carotid Atherosclerosis                  | 1 | 1 |
| Cerebrovascular accident                 | Disease                                  | 1 | 3 |
| Cerebrovascular accident                 | Ischemic stroke                          | 1 | 1 |
| Cerebrovascular accident                 | Myocardial Infarction                    | 1 | 1 |
| Cigarette smoke (substance)              | Tobacco                                  | 1 | 1 |
| coenzyme Q10                             | Disease                                  | 1 | 1 |
| Complement System Proteins               | Disease                                  | 1 | 1 |
| Coronary Arteriosclerosis                | Periodontitis                            | 1 | 1 |
| Coronary heart disease                   | Obesity                                  | 1 | 1 |
| COVID-19                                 | Critical Illness                         | 1 | 1 |
| COVID-19                                 | Respiratory Distress Syndrome, Adult     | 1 | 2 |
| Crohn's disease                          | Disease                                  | 1 | 1 |
| cytokine                                 | Rheumatoid Arthritis                     | 1 | 1 |
| DEFA1A3                                  | Periodontitis                            | 1 | 1 |
| dexamethasone                            | COVID-19                                 | 1 | 1 |
| Diabetes Mellitus, Non-Insulin-Dependent | Alzheimer's Disease                      | 1 | 1 |
| Diabetes Mellitus, Non-Insulin-Dependent | Sleep Apnea, Obstructive                 | 1 | 2 |
| Diabetes                                 | Obesity                                  | 1 | 4 |
| Diabetes                                 | Polycystic Ovary Syndrome                | 1 | 1 |
| Disease                                  | Fatty Liver                              | 1 | 1 |
| Disease                                  | Liver diseases                           | 1 | 1 |
| Disease                                  | Lupus Erythematosus, Systemic            | 1 | 1 |
| Dyslipidemias                            | Cardiovascular Diseases                  | 1 | 2 |
| Enzymes                                  | Vitamin D                                | 1 | 1 |
| ergocalciferol                           | calcifediol                              | 1 | 2 |
| ergocalciferol                           | Hypertensive disease                     | 1 | 1 |
| ergocalciferol                           | Vitamin D Deficiency                     | 1 | 3 |
| Ethanol                                  | Cardiovascular Diseases                  | 1 | 1 |
| Folate                                   | homocysteine                             | 1 | 4 |
| Free thyroxin                            | Thyrotropin                              | 1 | 1 |
| Galectin 3                               | Heart failure                            | 1 | 1 |
| Gastroesophageal reflux disease          | Asthma                                   | 1 | 1 |
| Genes                                    | Dyslipidemias                            | 1 | 1 |
| Genes                                    | Hypertensive disease                     | 1 | 1 |
| GJA1 gene GJA1                           | Asthma                                   | 1 | 1 |
| GJA1 gene GJA1                           | Hypertensive disease                     | 1 | 1 |
| Glaucoma                                 | Disease                                  | 1 | 1 |
| Glycosylated hemoglobin A                | Diabetes Mellitus, Non-Insulin-Dependent | 1 | 2 |

|                                                |                                          |   |    |
|------------------------------------------------|------------------------------------------|---|----|
| Hemoglobin                                     | Anemia                                   | 1 | 2  |
| homocysteine                                   | Cerebrovascular accident                 | 1 | 1  |
| Hydroxymethylglutaryl-CoA Reductase Inhibitors | Atherosclerosis                          | 1 | 1  |
| Hydroxymethylglutaryl-CoA Reductase Inhibitors | COG2                                     | 1 | 2  |
| Hydroxymethylglutaryl-CoA Reductase Inhibitors | Coronary heart disease                   | 1 | 1  |
| Hydroxymethylglutaryl-CoA Reductase Inhibitors | Dyslipidemias                            | 1 | 4  |
| Hyperglycemia                                  | Diabetes Mellitus, Non-Insulin-Dependent | 1 | 1  |
| Hyperlipidemia                                 | Diabetes                                 | 1 | 1  |
| Hyperlipidemia                                 | Disease                                  | 1 | 1  |
| Hypertensive disease                           | Cardiovascular morbidity                 | 1 | 3  |
| Hypertensive disease                           | Myocardial Ischemia                      | 1 | 1  |
| Hypertensive disease                           | Obesity                                  | 1 | 4  |
| Hypertensive disease                           | Sleep Apnea, Obstructive                 | 1 | 4  |
| Hyperuricemia                                  | Gout                                     | 1 | 1  |
| icosapent ethyl                                | Hypertriglyceridemia                     | 1 | 1  |
| IGHE                                           | Disease                                  | 1 | 3  |
| IMPACT gene                                    | Cerebrovascular accident                 | 1 | 2  |
| IMPACT gene                                    | Disease                                  | 1 | 3  |
| IMPACT gene                                    | Non-alcoholic Fatty Liver Disease        | 1 | 1  |
| Inflammatory Bowel Diseases                    | Crohn's disease                          | 1 | 1  |
| Insulin-Like Growth Factor Binding Protein 3   | Insulin-Like Growth Factor I             | 1 | 1  |
| Insulin                                        | Heart failure                            | 1 | 1  |
| Insulin                                        | Myocardial Infarction                    | 1 | 1  |
| Insulin                                        | Pancreatitis                             | 1 | 1  |
| Interleukin-6                                  | Hypertensive disease                     | 1 | 1  |
| Ischemic stroke                                | Atrial Fibrillation                      | 1 | 1  |
| LOC107984137                                   | Periodontitis                            | 1 | 1  |
| Low-Density Lipoproteins                       | High Density Lipoproteins                | 1 | 1  |
| Malnutrition                                   | Disease                                  | 1 | 1  |
| Metabolic syndrome                             | Diabetes                                 | 1 | 2  |
| Metabolic syndrome                             | Obesity                                  | 1 | 3  |
| Metformin                                      | Diabetes                                 | 1 | 6  |
| MTND1P5                                        | Periodontitis                            | 1 | 1  |
| Myocardial Infarction                          | Venous Thromboembolism                   | 1 | 1  |
| Nitrous Oxide                                  | Vitamin B 12                             | 1 | 1  |
| Non-alcoholic Fatty Liver Disease              | Obesity                                  | 1 | 2  |
| Non-alcoholic fatty liver                      | Diabetes Mellitus, Non-Insulin-Dependent | 1 | 2  |
| Non-alcoholic fatty liver                      | Fatty Liver                              | 1 | 1  |
| Obesity                                        | Chronic Disease                          | 1 | 3  |
| Obesity                                        | Diabetes                                 | 1 | 3  |
| Obesity                                        | Metabolic Diseases                       | 1 | 1  |
| Periodontitis                                  | Cardiovascular Diseases                  | 1 | 2  |
| Pharmaceutical Preparations                    | Asthma                                   | 1 | 18 |
| Pharmaceutical Preparations                    | Cerebrovascular accident                 | 1 | 4  |
| Pharmaceutical Preparations                    | COVID-19                                 | 1 | 2  |
| Pharmaceutical Preparations                    | Heart failure                            | 1 | 3  |
| Pharmaceutical Preparations                    | Hypertensive disease                     | 1 | 26 |
| Pharmaceutical Preparations                    | Ischemic stroke                          | 1 | 1  |
| Pharmaceutical Preparations                    | Rheumatoid Arthritis                     | 1 | 5  |
| Proteins                                       | Diabetes                                 | 1 | 1  |

|                             |                                          |   |   |
|-----------------------------|------------------------------------------|---|---|
| Rheumatoid Arthritis        | Osteoporosis                             | 1 | 1 |
| Risk factor, cardiovascular | Atherosclerosis                          | 1 | 1 |
| Risk factor, cardiovascular | Diabetes Mellitus, Non-Insulin-Dependent | 1 | 5 |
| Risk factor, cardiovascular | Hypertensive disease                     | 1 | 2 |
| Risk factor, cardiovascular | Obesity                                  | 1 | 2 |
| SIGLEC5                     | Periodontitis                            | 1 | 1 |
| STN gene EEF1A2             | COG2                                     | 1 | 3 |
| Testosterone                | Obesity                                  | 1 | 1 |
| Testosterone                | Vitamin D                                | 1 | 1 |
| tocilizumab                 | Rheumatoid Arthritis                     | 1 | 4 |
| Virus Diseases              | Common Cold                              | 1 | 2 |
| Vitamin B 12                | homocysteine                             | 1 | 3 |
| vitamin B12                 | Vitamin B 12 Deficiency                  | 1 | 1 |
| Vitamin D                   | Adiponectin                              | 1 | 1 |
| Vitamin D                   | Alzheimer's Disease                      | 1 | 1 |
| Vitamin D                   | Asthma                                   | 1 | 1 |
| Vitamin D                   | Cardiovascular Diseases                  | 1 | 2 |
| Vitamin D                   | Diabetes Mellitus, Non-Insulin-Dependent | 1 | 2 |
| Vitamin D                   | Genes                                    | 1 | 1 |
| Vitamin D                   | Risk factor, cardiovascular              | 1 | 1 |
| Vitamin E                   | Disease                                  | 1 | 3 |
| Vitamin supplementation     | Alzheimer's Disease                      | 1 | 1 |
| Vitamins                    | homocysteine                             | 1 | 1 |
| zinc                        | COVID-19                                 | 1 | 1 |

Table S4

| subject                                        | MR | RCT |
|------------------------------------------------|----|-----|
| Obesity                                        | 36 | 33  |
| Pharmaceutical Preparations                    | 26 | 92  |
| Diabetes Mellitus, Non-Insulin-Dependent       | 20 | 21  |
| Insulin                                        | 13 | 45  |
| Disease                                        | 13 | 9   |
| Lipoproteins                                   | 12 | 2   |
| Vitamin D                                      | 11 | 13  |
| ergocalciferol                                 | 11 | 8   |
| Hypertensive disease                           | 10 | 33  |
| Hydroxymethylglutaryl-CoA Reductase Inhibitors | 10 | 10  |
| Coronary Arteriosclerosis                      | 10 | 5   |
| C-reactive protein                             | 9  | 6   |
| COVID-19                                       | 9  | 6   |
| Vitamin supplementation                        | 8  | 11  |
| IMPACT gene                                    | 8  | 10  |
| Cerebrovascular accident                       | 8  | 7   |
| Myocardial Infarction                          | 7  | 4   |
| CD69 protein, human  CD69                      | 6  | 6   |
| Adiponectin                                    | 6  | 2   |
| Asthma                                         | 6  | 1   |
| homocysteine                                   | 5  | 9   |
| Cardiovascular Diseases                        | 5  | 6   |
| Genes                                          | 5  | 3   |
| cytokine                                       | 5  | 2   |
| GJA1 gene  GJA1                                | 4  | 3   |
| Testosterone                                   | 4  | 3   |
| Lipids                                         | 4  | 1   |
| mullerian-inhibiting hormone                   | 3  | 4   |
| Vitamin B 12                                   | 3  | 4   |
| Dyslipidemias                                  | 3  | 3   |
| Ethanol                                        | 3  | 3   |
| Atrial Fibrillation                            | 3  | 2   |
| Amino Acids, Branched-Chain                    | 3  | 1   |
| High Density Lipoproteins                      | 3  | 1   |
| Polycystic Ovary Syndrome                      | 3  | 1   |
| Vitamin D Deficiency                           | 3  | 1   |
| Risk factor, cardiovascular                    | 2  | 10  |
| Diabetes                                       | 2  | 5   |
| Hyperandrogenism                               | 2  | 5   |
| Metabolic syndrome                             | 2  | 5   |
| Non-alcoholic fatty liver                      | 2  | 3   |
| Antioxidants                                   | 2  | 2   |
| Apolipoprotein E  APOE                         | 2  | 2   |
| Atherosclerosis                                | 2  | 2   |
| Hyperlipidemia                                 | 2  | 2   |
| Diabetic Nephropathy                           | 2  | 1   |
| Heart failure                                  | 2  | 1   |

|                                              |   |   |
|----------------------------------------------|---|---|
| Metformin                                    | 1 | 6 |
| Analgesics                                   | 1 | 4 |
| Folate                                       | 1 | 4 |
| tocilizumab                                  | 1 | 4 |
| IGHE                                         | 1 | 3 |
| STN gene EEF1A2                              | 1 | 3 |
| Vitamin E                                    | 1 | 3 |
| Adipokines                                   | 1 | 2 |
| Age related macular degeneration             | 1 | 2 |
| Angiotensin-Converting Enzyme Inhibitors     | 1 | 2 |
| Anti-Inflammatory Agents                     | 1 | 2 |
| Glycosylated hemoglobin A                    | 1 | 2 |
| Hemoglobin                                   | 1 | 2 |
| Non-alcoholic Fatty Liver Disease            | 1 | 2 |
| Periodontitis                                | 1 | 2 |
| Virus Diseases                               | 1 | 2 |
| acylcarnitine                                | 1 | 1 |
| Alanine Transaminase                         | 1 | 1 |
| Anticoagulants                               | 1 | 1 |
| Apolipoproteins                              | 1 | 1 |
| Apolipoproteins B                            | 1 | 1 |
| ascorbic acid                                | 1 | 1 |
| bempedoic acid                               | 1 | 1 |
| Beta Carotene                                | 1 | 1 |
| Biological Markers                           | 1 | 1 |
| Body mass index                              | 1 | 1 |
| Carotid Intima-Media Thickness               | 1 | 1 |
| Cigarette smoke (substance)                  | 1 | 1 |
| coenzyme Q10                                 | 1 | 1 |
| Complement System Proteins                   | 1 | 1 |
| Coronary heart disease                       | 1 | 1 |
| Crohn's disease                              | 1 | 1 |
| DEFA1A3                                      | 1 | 1 |
| dexamethasone                                | 1 | 1 |
| Enzymes                                      | 1 | 1 |
| Free thyroxin                                | 1 | 1 |
| Galectin 3                                   | 1 | 1 |
| Gastroesophageal reflux disease              | 1 | 1 |
| Glaucoma                                     | 1 | 1 |
| Hyperglycemia                                | 1 | 1 |
| Hyperuricemia                                | 1 | 1 |
| icosapent ethyl                              | 1 | 1 |
| Inflammatory Bowel Diseases                  | 1 | 1 |
| Insulin-Like Growth Factor Binding Protein 3 | 1 | 1 |
| Interleukin-6                                | 1 | 1 |
| Ischemic stroke                              | 1 | 1 |
| LOC107984137                                 | 1 | 1 |
| Low-Density Lipoproteins                     | 1 | 1 |
| Malnutrition                                 | 1 | 1 |
| MTND1P5                                      | 1 | 1 |

|                      |   |   |
|----------------------|---|---|
| Nitrous Oxide        | 1 | 1 |
| Proteins             | 1 | 1 |
| Rheumatoid Arthritis | 1 | 1 |
| SIGLEC5              | 1 | 1 |
| vitamin B12          | 1 | 1 |
| Vitamins             | 1 | 1 |
| zinc                 | 1 | 1 |

Table S5

| object                                   | MR | RCT |
|------------------------------------------|----|-----|
| Disease                                  | 50 | 51  |
| Cardiovascular Diseases                  | 43 | 62  |
| Diabetes Mellitus, Non-Insulin-Dependent | 37 | 63  |
| Obesity                                  | 29 | 36  |
| COVID-19                                 | 16 | 12  |
| Alzheimer's Disease                      | 12 | 14  |
| Coronary Arteriosclerosis                | 12 | 9   |
| Cerebrovascular accident                 | 10 | 13  |
| Diabetes                                 | 10 | 33  |
| Hypertensive disease                     | 10 | 36  |
| Asthma                                   | 8  | 25  |
| Heart failure                            | 8  | 9   |
| Polycystic Ovary Syndrome                | 8  | 10  |
| Pharmaceutical Preparations              | 7  | 2   |
| Coronary heart disease                   | 6  | 3   |
| Ischemic stroke                          | 6  | 4   |
| Vitamin D Deficiency                     | 5  | 9   |
| Atherosclerosis                          | 4  | 3   |
| Rheumatoid Arthritis                     | 4  | 11  |
| HMGCR gene HMGCR                         | 3  | 1   |
| Risk factor, cardiovascular              | 3  | 2   |
| Body mass index                          | 2  | 1   |
| COG2                                     | 2  | 5   |
| Diabetes Mellitus, Insulin-Dependent     | 2  | 1   |
| Dyslipidemias                            | 2  | 5   |
| homocysteine                             | 2  | 8   |
| Multiple Sclerosis                       | 2  | 1   |
| Myocardial Infarction                    | 2  | 2   |
| Myocardial Ischemia                      | 2  | 2   |
| Parkinson Disease                        | 2  | 1   |
| Periodontitis                            | 2  | 2   |
| Psoriasis                                | 2  | 1   |
| Sleep Apnea, Obstructive                 | 2  | 7   |
| Vitamin D                                | 2  | 2   |
| Adiponectin                              | 1  | 1   |
| Alkaline Phosphatase                     | 1  | 1   |
| Anemia                                   | 1  | 2   |
| Angiotensin Receptor                     | 1  | 2   |
| Apolipoprotein A-I                       | 1  | 1   |
| Arteriosclerosis                         | 1  | 1   |
| Atrial Fibrillation                      | 1  | 1   |
| Blind Vision                             | 1  | 2   |
| calcifediol                              | 1  | 2   |
| Cardiovascular morbidity                 | 1  | 3   |
| Carotid Atherosclerosis                  | 1  | 1   |
| Chronic Disease                          | 1  | 3   |
| Common Cold                              | 1  | 2   |

|                                      |   |   |
|--------------------------------------|---|---|
| Critical Illness                     | 1 | 1 |
| Crohn's disease                      | 1 | 1 |
| Degenerative polyarthritis           | 1 | 4 |
| Fatty Acids                          | 1 | 1 |
| Fatty Liver                          | 1 | 1 |
| Genes                                | 1 | 1 |
| Gout                                 | 1 | 1 |
| High Density Lipoproteins            | 1 | 1 |
| Hypercholesterolemia                 | 1 | 1 |
| Hypertriglyceridemia                 | 1 | 1 |
| Insulin-Like Growth Factor I         | 1 | 1 |
| Liver diseases                       | 1 | 1 |
| Lupus Erythematosus, Systemic        | 1 | 1 |
| Metabolic Diseases                   | 1 | 1 |
| Non-alcoholic Fatty Liver Disease    | 1 | 1 |
| Osteoporosis                         | 1 | 1 |
| Pancreatitis                         | 1 | 1 |
| Respiratory Distress Syndrome, Adult | 1 | 2 |
| Thyrotropin                          | 1 | 1 |
| Tobacco                              | 1 | 1 |
| Venous Thromboembolism               | 1 | 1 |
| Vitamin B 12                         | 1 | 1 |
| Vitamin B 12 Deficiency              | 1 | 1 |

Table S6

|                                      | MR                 | RCT                         |                                                |
|--------------------------------------|--------------------|-----------------------------|------------------------------------------------|
|                                      | Mokry 2015         | James 2013                  | Hempel 2017                                    |
| Exposure:                            | vitamin D          | vitamin D                   | vitamin D                                      |
| Outcome(s):                          | multiple sclerosis | multiple sclerosis relapse  | multiple sclerosis as measured with EDSS score |
| Population (Sex, ethnicity and age): | mixed, European    | mixed, European             | mixed, European                                |
| Population (health status):          | all                | meta-analysis of 5 RCTs     | meta-analysis of 5 RCTs                        |
| Comparator group:                    | NA                 | low dose vitamin D, placebo | low dose vitamin D, placebo                    |
| Prevention or Treatment:             | prevention         | treatment                   | treatment                                      |
| Direction of effect:                 | negative           | null                        | null                                           |
| Intervention duration:               | lifetime           | range: 6 months-96 weeks    | range: 6 months-24 months                      |
| Statistic:                           | odds ratio         | odds ratio                  | standardized mean difference                   |
| Citations no:                        | 340                | 122                         | 38                                             |
